# Supplementary material for: A Bayesian approach to modeling phytoplankton population dynamics from size distribution time series
Source: PubMed Central journal article supplement (PMC8794270; doi:10.1371/journal.pcbi.1009733), 2022-01-14
Supplement: pcbi.1009733.s004.pdf [file pcbi.1009733.s004.pdf]

**Table S1. All models.**

| <b>Model*</b>    | <b>Growth</b>             | <b>Division</b> | <b>Loss</b>          |
|------------------|---------------------------|-----------------|----------------------|
| $m_{\text{bmx}}$ | basic                     | monotonic       | x (no loss)          |
| $m_{\text{bmb}}$ | basic                     | monotonic       | basic                |
| $m_{\text{pmb}}$ | power-law size-dependence | monotonic       | basic                |
| $m_{\text{fmb}}$ | free size-dependence      | monotonic       | basic                |
| $m_{\text{fmf}}$ | free size-dependence      | monotonic       | free size-dependence |
| $m_{\text{btb}}$ | basic                     | time-dependent  | basic                |
| $m_{\text{ptb}}$ | power-law size-dependence | time-dependent  | basic                |
| $m_{\text{ftb}}$ | free size-dependence      | time-dependent  | basic                |
| $m_{\text{ftf}}$ | free size-dependence      | time-dependent  | free size-dependence |

\*The letters in the subscript of the model name denote the growth, division, and loss parameterizations used in the model, respectively.
